# Supplementary material
Source: publisher figshare collection journal article supplement (https://acs.figshare.com/ndownloader/files/5103427)

### **Detailed list of the contents of the Supporting Information:**

- (1) General experimental details and spectral and analytical data of compounds **3a**, **3b**, **5a**, **5b**, **6a**, **6b**, **9a**, **10a**, **11a**, **12a**, and **13** – Pages S2-S8
- (2) Copies of  $^1\text{H}$  NMR spectra of **3a**, **3b**, **5a**, **5b**, **6a**, **6b**, **10a** and **12a** – Pages S9-S16
- (3) Copies of  $^{13}\text{C}$  NMR spectra of **6a**, **6b**, **10a** and **12a** – S17-S20
- (4) copy of the X-ray picture of **13** – Page S21
- (5) CIF file of the compound **13**

## Experimental

**1,7,7-Trimethyl-2-endo-oxiranyl-bicyclo[2.2.1]heptan-2-ol (3a) and 1,7,7-Trimethyl-2-exo-oxiranyl-bicyclo[2.2.1]heptan-2-ol (3b).** To a solution of crude allyl alcohol **2** (500 mg, 2.78 mmol), in dichloromethane (30 mL) was added *m*-CPBA (1.44 g, 50% by weight, 4.17 mmol) at a time. The mixture was stirred for 18 h at room temperature. Then the reaction mixture was diluted with dichloromethane (50 mL) and washed successively with saturated aqueous sodium bisulphite (2 × 20 mL), saturated aqueous sodium bicarbonate (2 × 20 mL) and finally with brine (1 × 20 mL) and then dried (Na<sub>2</sub>SO<sub>4</sub>). After removal of solvent under reduced pressure the crude material obtained was subjected to column chromatography over silica gel (15% ethyl acetate in light petroleum) to afford the major epoxy alcohol **3a** (270 mg, 50%) as a colorless liquid: IR (neat)  $\nu$  3502, 2954, 2935, 2873, 1732, 1456, 1388, 1371 cm<sup>-1</sup>; <sup>1</sup>H NMR (300 MHz, CDCl<sub>3</sub>)  $\delta$  0.86 (s, 3H), 1.12 (s, 3H), 1.02-1.98 (m, 7H), 2.70-2.76 (m, 2H), 2.99-3.03 (m, 1H); <sup>13</sup>C NMR (75 MHz, CDCl<sub>3</sub>)  $\delta$  10.5, 20.0, 20.9, 26.9, 29.7, 41.9, 43.6, 44.2, 45.4, 49.7, 55.7, 77.6; HR-MS C<sub>12</sub>H<sub>20</sub>O<sub>2</sub>Na calcd, 219.1360 (M + Na); found, 219.1299 and the minor epoxy alcohol **3b** (195 mg, 36%) as a colourless liquid: IR (neat)  $\nu$  3502, 2950, 2937, 2875, 1738, 1456, 1388, 1373 cm<sup>-1</sup>; <sup>1</sup>H NMR (300 MHz, CDCl<sub>3</sub>)  $\delta$  0.86 (s, 3H), 0.89 (s, 3H), 1.09 (s, 3H), 1.03-1.90 (m, 7H), 2.62 (dd, *J* = 5.16, 4.2 Hz, 1H), 2.78 (dd, *J* = 5.16, 2.7 Hz, 1H), 3.17 (dd, *J* = 4.16, 2.8 Hz, 1H); <sup>13</sup>C NMR (75 MHz, CDCl<sub>3</sub>)  $\delta$  10.8, 20.5, 21.1, 27.1, 31.6, 41.9, 43.5, 44.8, 49.6, 52.5, 55.2, 77.4; HR-MS C<sub>12</sub>H<sub>20</sub>O<sub>2</sub>Na calcd, 219.1360 (M + Na); found, 219.1366.

**(3'R)-1,7,7-trimethyl-3'-[(prop-2-ynyloxy)methyl]spiro[bicyclo[2.2.1]heptane-2,2'-oxirane] (5a).** To a stirred suspension of NaH (49 mg, 60% dispersion; 2.04 mmol) in dry THF-DMSO (10:1) (3 mL) was added dropwise a solution of epoxy alcohol **3a** (200 mg, 1.02 mmol) in dry THF (5 mL) at 0°C under nitrogen. After the evolution of hydrogen ceased (approx. 25 min), a solution of propargyl bromide (145 mg, 1.22 mmol) in THF (5 mL) was added dropwise at 0°C over 20 min. The reaction mixture was then

stirred at room temperature for 8h and then carefully decomposed with ice water. After removal of most of the solvent under reduced pressure, the resulting residue was extracted with diethyl ether ( $4 \times 25$  mL). The combined ether extract was washed successively with water ( $2 \times 10$  mL) and brine ( $1 \times 10$  mL) and then dried ( $\text{Na}_2\text{SO}_4$ ). Solvent was removed under reduced pressure, and the oil obtained was purified by column chromatography over silica gel (10% ethyl acetate in light petroleum) to furnish **5a** (186 mg, 78%) as a colorless liquid: IR (neat)  $\nu$  3305, 3265, 2952, 2873, 2116, 1741, 1475, 1452, 1388, 1371, 1319, 1265  $\text{cm}^{-1}$ ;  $^1\text{H}$  NMR (300 MHz,  $\text{CDCl}_3$ )  $\delta$  0.62 (s, 3H), 0.86 (s, 3H), 0.97 (s, 3H), 1.10-1.92 (m, 7H), 2.45 (t,  $J = 2.4$  Hz, 1H), 2.94-2.97 (m, 1/2H), 3.03-3.06 (m, 1/2H), 3.46 (dd,  $J = 10.8, 6.6$  Hz, 1H), 3.66 (dd,  $J = 11.1, 6.7$  Hz, 1H), 3.74 (dd,  $J = 10.9, 4.0$  Hz, 1H), 3.87 (dd,  $J = 11.2, 3.6$  Hz, 1H), 4.23 ( $\text{AB}_q$  and each peak splits into doublet,  $J = 15.8, 2.6$  Hz, 2H);  $^{13}\text{C}$  NMR (75 MHz,  $\text{CDCl}_3$ )  $\delta$  8.75, 11.68, 19.28, 19.38, 19.55, 27.29, 27.74, 31.61, 32.17, 35.20, 40.18, 44.32, 44.56, 47.61, 47.62, 53.38, 58.08, 58.21, 59.65, 68.25, 70.11, 70.78, 74.59, 79.39; Anal. Calcd for  $\text{C}_{15}\text{H}_{22}\text{O}_2$ : C, 76.88; H, 9.46. Found: C, 76.68; H, 9.48.

**(3'S)-1,7,7-trimethyl-3'-[(prop-2-ynyloxy)methyl]spiro[bicyclo[2.2.1]heptane-2,2'-oxirane] (5b):** colorless oil; 78% yield; IR (neat)  $\nu$  2954, 2875, 2200, 17439, 1454, 1390, 1263  $\text{cm}^{-1}$ ;  $^1\text{H}$  NMR (300 MHz,  $\text{CDCl}_3$ )  $\delta$  0.75 (s, 1H), 0.85 (s, 3H), 0.95 (s, 3H), 1.14-1.91 (m, 7H), 2.45 (t,  $J = 2.4$  Hz, 1H), 3.03 (dd,  $J = 6.6, 3.3$  Hz, 1H), 3.66 (dd,  $J = 11.1, 6.7$  Hz, 1H), 3.87 (dd,  $J = 11.1, 3.3$  Hz, 1H), 4.23 ( $\text{AB}_q$  and each peak splitted into doublet,  $J = 15.7, 2.4$  Hz, 2H);  $^{13}\text{C}$  NMR (75 MHz,  $\text{CDCl}_3$ )  $\delta$  11.75, 19.37, 19.68, 27.81, 31.69, 40.26, 44.6, 49.3, 58.2, 59.7, 68.3, 74.6; Anal. Calcd for  $\text{C}_{15}\text{H}_{22}\text{O}_2$ : C, 76.88; H, 9.46. Found: C, 76.54; H, 9.37.

**(1R)-1-(2,2-dimethyl-3-methylenebicyclo[2.2.1]hept-1-yl)-2-(prop-2-ynyloxy)ethanol (6a):** A solution of  $\text{Cp}_2\text{TiCl}_2$  (225 mg, 0.9 mmol) in THF (5 mL) (dried over Na) was stirred with activated zinc dust (195 mg, 2.99 mmol) for 1h under argon (activated zinc dust was prepared by washing 20 gm of commercially

available zinc dust with 60 mL of 4 N HCl and thorough washing with water until the washings became neutral and finally with dry acetone and then drying in vacuo). The resulting green solution was then added dropwise to a stirred solution of the epoxide **5a** (100 mg, 0.43 mmol) in dry THF (12 mL) at room temperature under argon. It was stirred for an additional 1h and decomposed with saturated sodium dihydrogen phosphate (10 mL). After removal of most of the THF under reduced pressure, the crude material obtained was purified by column chromatography over silica gel (5% ethyl acetate in light petroleum) to furnish **6a** (72 mg, 72%) as a colourless liquid. IR (neat)  $\nu$  3463, 3307, 2931, 2873, 1739, 1654, 1456, 1388, 1369, 1261  $\text{cm}^{-1}$ ;  $^1\text{H}$  NMR (300 MHz,  $\text{CDCl}_3$ )  $\delta$  1.03 (s, 3H), 1.08 (s, 3H), 1.21-1.89 (m, 7H), 2.45 (t,  $J = 2.4$  Hz, 1H), 3.59 (dd,  $J = 9.6, 8.4$  Hz, 1H), 3.83 (dd,  $J = 9.6, 2.4$  Hz, 1H), 4.14-4.30 (m, 3H), 4.72 (s, 1H), 4.85 (s, 1H);  $^{13}\text{C}$  NMR (75 MHz,  $\text{CDCl}_3$ )  $\delta$  24.9, 26.3, 29.7, 31.2, 38.5, 43.7, 47.1, 57.1, 58.9, 71.4, 72.2, 75.1, 80.0, 100.4, 165.4; Anal. Calcd. for  $\text{C}_{15}\text{H}_{22}\text{O}_2$ : C, 76.88; H, 9.46. Found: C, 76.26; H, 9.50.

**(1S)-1-(2,2-dimethyl-3-methylenebicyclo[2.2.1]hept-1-yl)-2-(prop-2-ynyloxy)ethanol (6b)** was prepared from **5b** by following the same procedure as described for **6a**: colorless oil; 75% yield, IR (neat)  $\nu$  3477, 3307, 2958, 2875, 2115, 1652, 1461, 1361  $\text{cm}^{-1}$ ;  $^1\text{H}$  NMR (300 MHz,  $\text{CDCl}_3$ )  $\delta$  0.99 (s, 3H), 1.07 (s, 3H), 1.09-2.00 (m, 7H), 2.44 (t,  $J = 2.4$  Hz, 1H), 3.46 (t,  $J = 9.0$  Hz, 1H), 3.78 (dd,  $J = 9.3, 2.6$  Hz, 1H), 4.16 (dd,  $J = 8.7, 2.5$  Hz, 1H), 4.19 (d,  $J = 2.4$  Hz, 2H), 4.65 (s, 1H), 4.74 (s, 1H);  $^{13}\text{C}$  NMR (75 MHz,  $\text{CDCl}_3$ )  $\delta$  23.94, 25.8, 29.1, 29.8, 37.2, 43.1, 46.9, 55.7, 58.3, 70.4, 72.0, 74.5, 79.4, 99.3, 165.7; Anal. Calcd. for  $\text{C}_{15}\text{H}_{22}\text{O}_2$ : C, 76.88; H, 9.46. Found: C, 76.16; H, 9.26.

**(3'R)-3'-[(benzyloxy)methyl]-1,7,7-trimethylspiro[bicyclo[2.2.1]heptane-2,2'-oxirane] (9a)**: To a stirred suspension of NaH (49 mg, 60% dispersion; 2.04 mmol) in dry THF-DMSO (10:1) (3 mL) was added dropwise a solution of epoxy alcohol **3a** (200 mg, 1.02 mmol) in dry THF (5 mL) at  $0^\circ\text{C}$  under nitrogen. After the evolution of hydrogen ceased (approx. 25 min), a solution of benzyl bromide (192

mg, 1.12 mmol) in THF (5 mL) was added dropwise at 0 °C over 20 min. The reaction mixture was then stirred at room temperature for 8 h and carefully decomposed with ice-water (10 mL). After removal of most of the volatiles under reduced pressure, the resulting residue was extracted with diethyl ether (4 × 25 mL). The combined ether extract was washed successively with water (2 × 10 mL), brine (1 × 10 mL) and then dried (Na<sub>2</sub>SO<sub>4</sub>). Solvent was removed under reduced pressure and the oil obtained was purified by column chromatography over silica gel (5% ethyl acetate in light petroleum) to furnish **9a** (222 mg, 76%) as a colourless liquid: IR (neat)  $\nu$  3485, 3030, 2952, 2871, 1741, 1496, 1454, 1388, 1361, 1319, 1274, 1203 cm<sup>-1</sup>; <sup>1</sup>H NMR (300 MHz, CDCl<sub>3</sub>)  $\delta$  0.641 (s, 3H), 0.87 (s, 3H), 0.98 (s, 3H), 0.70-1.89 (m, 7H), 2.99-3.02 (m, 1H), 3.45 (dd, *J* = 10.9, 6.5 Hz, 1H), 3.66 (dd, *J* = 10.9, 4.1 Hz, 1H), 4.5 (ABq, *J* = 11.8 Hz, 2H), 7.25-7.36 (m, 5H, ArH); <sup>13</sup>C NMR (75 MHz, CDCl<sub>3</sub>)  $\delta$  9.28, 20.07, 27.82, 30.33, 32.71, 35.74, 40.74, 43.71, 44.85, 48.12, 54.31, 60.67, 69.18, 71.08, 73.42, 100.34, 120.02, 128.84, 138.54; Anal. Calcd for C<sub>19</sub>H<sub>26</sub>O<sub>2</sub>: C, 79.68; H, 9.15. Found: C, 79.58; H, 9.16.

**(1R)-2-(benzyloxy)-1-(2,2-dimethyl-3-methylenebicyclo[2.2.1]hept-1-yl)ethanol (10a):** A solution of Cp<sub>2</sub>TiCl<sub>2</sub> (183 mg, 0.73 mmol) in dry THF (5 mL) was stirred with activated zinc dust (160 mg, 2.45 mmol) for 1 h under argon. The resulting green solution was then added dropwise to a stirred solution of the epoxide **9a** (100 mg, 0.35 mmol) in dry THF (5 mL) at room temperature under argon during 30 min. After additional stirring for 1 h, the reaction mixture was decomposed with saturated di-sodium hydrogen phosphate (10 mL). After removal of most of the THF under reduced pressure, the resulting residue was extracted with diethyl ether (4 × 25 mL). The combined ether extract was washed successively with saturated NaHCO<sub>3</sub> (2 × 10 mL), brine (1 × 10 mL) and then dried (Na<sub>2</sub>SO<sub>4</sub>). Solvent was removed under reduced pressure and the brown gummy residue obtained was purified by column chromatography over silica gel (5% ethyl acetate in light petroleum) to furnish **10a** (74 mg, 74%) as a colorless liquid: IR (neat)  $\nu$  3444, 3064, 3030, 2950, 2871, 1722, 1651, 1494, 1454, 1386, 1361, 1315, 1274, 1201 cm<sup>-1</sup>; <sup>1</sup>H NMR

(300 MHz, CDCl<sub>3</sub>)  $\delta$  1.02 (s, 3H), 1.07 (s, 3H), 1.20-1.85 (m, 7H), 3.57 (dd,  $J$  = 9.4, 8.4 Hz, 1H), 3.73 (dd,  $J$  = 9.6, 2.7 Hz, 1H), 4.18 (dd,  $J$  = 8.4, 2.5 Hz, 1H), 4.60 (d,  $J$  = 2.9 Hz, 2H), 4.69 (s, 1H), 4.82 (s, 1H), 7.25-7.48 (m, 5H, ArH); <sup>13</sup>C NMR (75 MHz, CDCl<sub>3</sub>)  $\delta$  24.9, 26.3, 29.7, 31.1, 38.5, 43.7, 47.1, 57.0, 71.5, 72.5, 73.7, 100.3, 128.1, 128.5, 130.0, 130.1, 133.5, 138.5, 165.5; Anal. Calcd. for C<sub>19</sub>H<sub>26</sub>O<sub>2</sub>: C, 79.68; H, 9.15. Found C, 79.58; H, 9.16.

**(1*R*)-2-(benzyloxy)-1-(2,2-dimethyl-3-methylenebicyclo[2.2.1]hept-1-yl)-1-(3,5-dinitrophenyl)ethyl acetate (13):** To a stirred solution of 3,5-dinitrobenzoic acid (100 mg, 0.47 mmol), DCC (180 mg, 0.87 mmol) and DMAP (20 mg, 0.16 mmol) in CH<sub>2</sub>Cl<sub>2</sub> (2 mL) at 0 °C was added a solution of the alcohol **10a** (120 mg, 0.419 mmol) in CH<sub>2</sub>Cl<sub>2</sub> (3 mL). The reaction mixture was allowed to stir for another 6h. It was then diluted with ether (20 mL), filtered and the filtrate obtained was washed successively with saturated aqueous solution of sodium bicarbonate (2 x 10 mL), water (2 x 10 mL) and brine (1 x 10 mL) and then dried (Na<sub>2</sub>SO<sub>4</sub>). After removal of solvent under reduced pressure, the crude mass obtained was purified by column chromatography over silica gel (10% ethyl acetate in petroleum ether) to furnish the ester **13** (200 mg, 99%) as a crystalline solid, m. p. 104-106 °C; IR (KBr)  $\nu$  3103, 2949, 2877, 1735, 1627, 1548, 1450, 1344, 1280, 1174, 1093, 1072 cm<sup>-1</sup>; <sup>1</sup>H NMR (300 MHz, CDCl<sub>3</sub>)  $\delta$  1.03 (s, 3H), 1.07 (s, 3H), 1.26-1.35 (m, 1H), 1.40 (d,  $J$  = 9.7 Hz, 1H), 1.53-1.59 (m, 1H), 1.69-1.93 (m, 4H), 3.88 (d,  $J$  = 6.2 Hz, 2H), 4.55 (ABq,  $J$  = 12.1, 36.2 Hz, 2H), 4.67 (s, 1H), 4.83 (s, 1H), 5.85 (dd,  $J$  = 6.4, 4.6 Hz, 1H), 7.22 (s, 5H), 9.09 (s, 2H), 9.2 (s, 1H); <sup>13</sup>C NMR (75 MHz, CDCl<sub>3</sub>)  $\delta$  24.2, 25.8, 29.3, 31.3, 39.3, 43.4, 46.6, 55.5, 69.6, 72.8, 76.3, 100.3, 122.1, 127.3, 127.4, 128.3, 129.3, 134.2, 137.7, 148.5, 162.1, 163.6.

**(3'*R*)-3'-(ethoxymethyl)-1,7,7-trimethylspiro[bicyclo[2.2.1]heptane-2,2'-oxirane] Preparation (11a):** To a stirred suspension of NaH (49 mg, 60% dispersion; 2.04 mmol) in dry THF-DMSO (10:1) (3 mL) was added dropwise a solution of epoxy alcohol **3a** (200 mg, 1.02 mmol) in dry THF (5 mL) at 0 °C under nitrogen. After the evolution of hydrogen ceased (approx. 25 min), a solution of MeI (580 mg, 4.08

mmol) in THF (5 mL) was added dropwise at 0°C over 20 min. The reaction mixture was then stirred at room temperature for 8 h and carefully decomposed with ice-water (10 mL). After removal of most of the volatiles under reduced pressure, the resulting residue was extracted with diethyl ether (4 × 25 mL). The combined ether extract was washed successively with water (2 × 10 mL), brine (1 × 10 mL) and then dried (Na<sub>2</sub>SO<sub>4</sub>). Solvent was removed under reduced pressure and the oil obtained was purified by column chromatography over silica gel (5% ethyl acetate in light petroleum) to furnish **11a** (158 mg, 74%) as a colorless liquid: IR (neat)  $\nu$  2954, 2875, 1732, 1454, 1388, 1371, 1261, 1195, 1124 cm<sup>-1</sup>; <sup>1</sup>H NMR (300 MHz, CDCl<sub>3</sub>)  $\delta$  0.63 (s, 3H), 0.87 (s, 3H), 0.98 (s, 3H), 1.00-1.91 (m, 7H), 2.94 (dd, *J* = 6.5, 3.9 Hz., 1H), 3.33 (dd, *J* = 11.1, 6.5 Hz., 1H), 3.41 (s, 3H), 3.60 (dd, *J* = 11.2, 3.9 Hz., 1H); <sup>13</sup>C NMR (75 MHz, CDCl<sub>3</sub>)  $\delta$  9.2, 19.5, 19.7, 27.8, 32.6, 35.7, 40.7, 44.7, 48.1, 54.1, 59.4, 72.1; Anal. Calcd for C<sub>13</sub>H<sub>22</sub>O<sub>2</sub>: C, 74.24; H, 10.54. Found: C, 74.03; H, 10.41.

**(1R)-1-(2,2-dimethyl-3-methylenebicyclo[2.2.1]hept-1-yl)-2-methoxyethanol (12a):** A solution of Cp<sub>2</sub>TiCl<sub>2</sub> (250 mg, 1.004 mmol) in dry THF (12.5 mL) was stirred with activated zinc dust (218 mg, 3.33 mmol) for 1 h under argon. The resulting green solution was then added dropwise to a stirred solution of the epoxide **11a** (100 mg, 0.476 mmol) in dry THF (12 mL) at room temperature under argon. It was stirred for an additional 1 h and decomposed with saturated sodium dihydrogen phosphate (10 mL). After removal of most of the THF under reduced pressure, the resulting residue was extracted with diethyl ether (4 × 25 mL). The combined ether extract was washed successively with water (2 × 10 mL), brine (1 × 10 mL) and then dried (Na<sub>2</sub>SO<sub>4</sub>). Solvent was removed under reduced pressure and the crude material obtained was purified by column chromatography over silica gel (10% ethyl acetate in light petroleum) to furnish **12a** (72 mg, 71%): IR (neat)  $\nu$  3465, 2956, 2927, 2879, 1651, 1458, 1361, 1195, 1124 cm<sup>-1</sup>; <sup>1</sup>H NMR (300 MHz, CDCl<sub>3</sub>)  $\delta$  1.03 (s, 3H), 1.08 (s, 3H), 1.16-1.88 (m, 7H), 2.35 (brs, OH), 3.42 (s, 3H), 3.47 (dd, *J* = 9.6, 8.6 Hz, 1H), 3.63 (dd, *J* = 9.7, 2.6 Hz, 1H), 4.14 (dd, *J* = 8.5, 2.5 Hz, 1H), 4.71 (s, 1H),

4.85 (s, 1H);  $^{13}\text{C}$  NMR (75 MHz,  $\text{CDCl}_3$ )  $\delta$  24.9, 26.3, 29.6, 31.1, 38.4, 43.7, 47.1, 57.0, 59.4, 71.3, 74.8, 100.3, 165.4; Anal. Calcd. for  $\text{C}_{13}\text{H}_{22}\text{O}_2$ : C, 74.24; H, 10.54. Found: C, 74.18; H, 10.55.



## Copies of Spectra

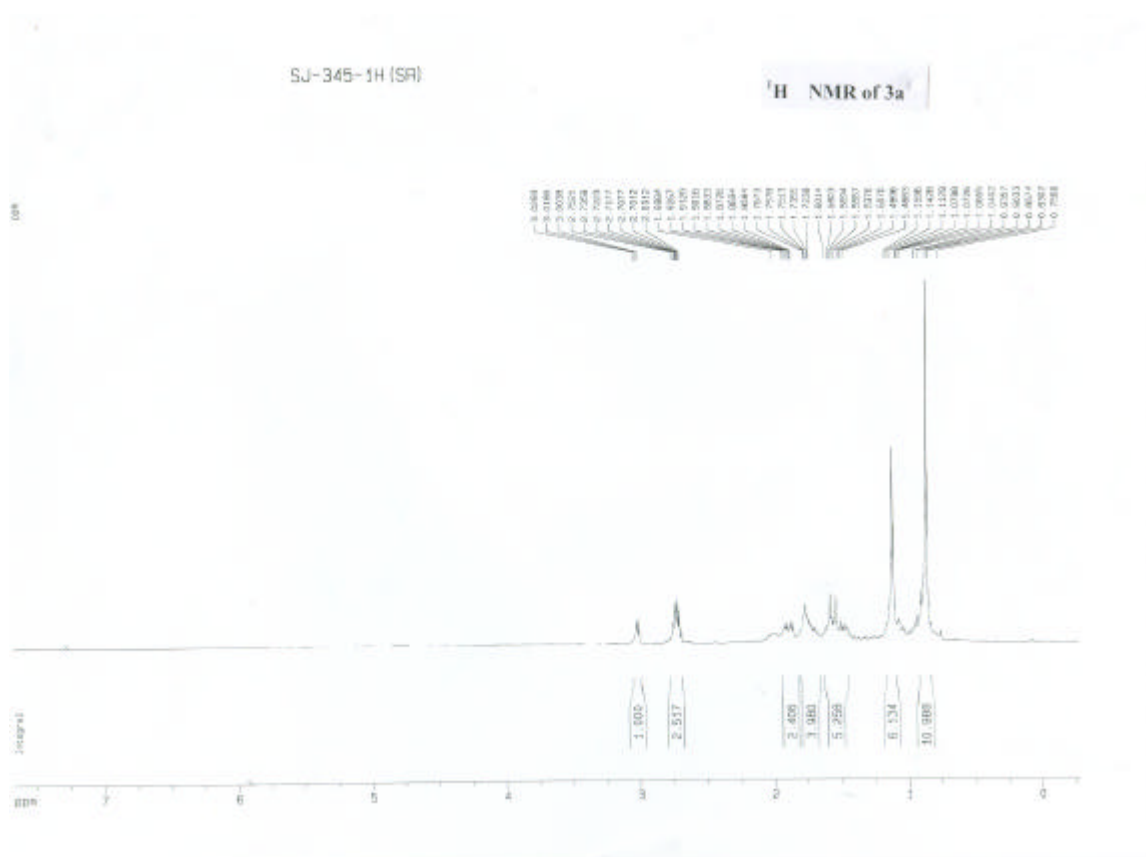

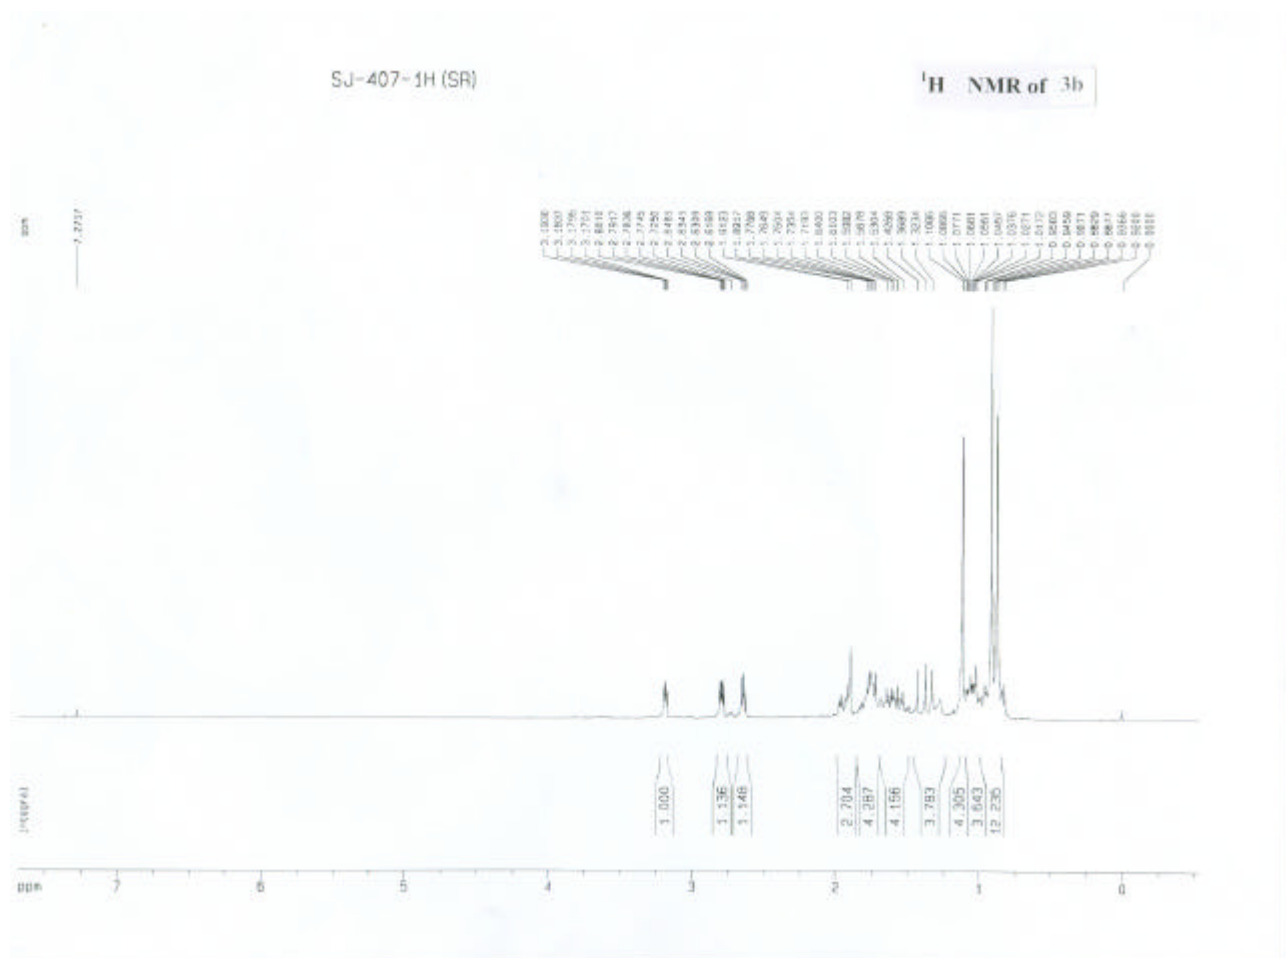

SJ-343-1H (SR)

<sup>1</sup>H NMR of 5a

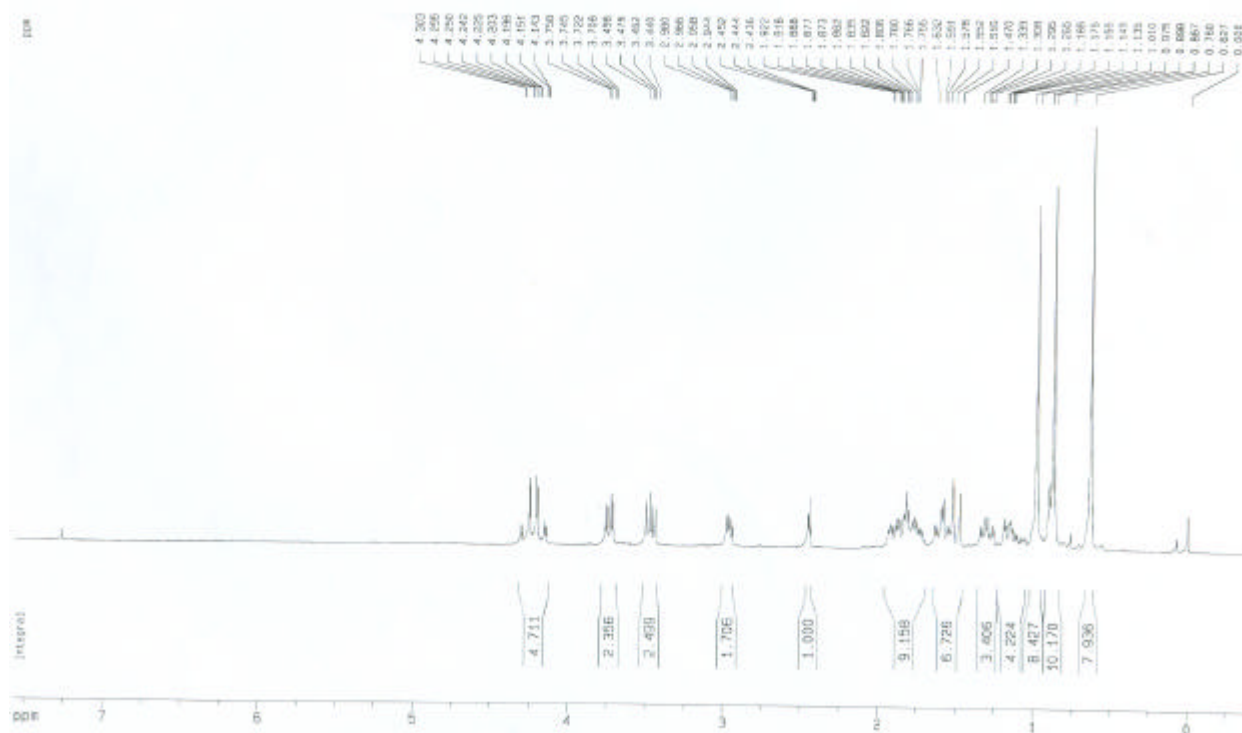

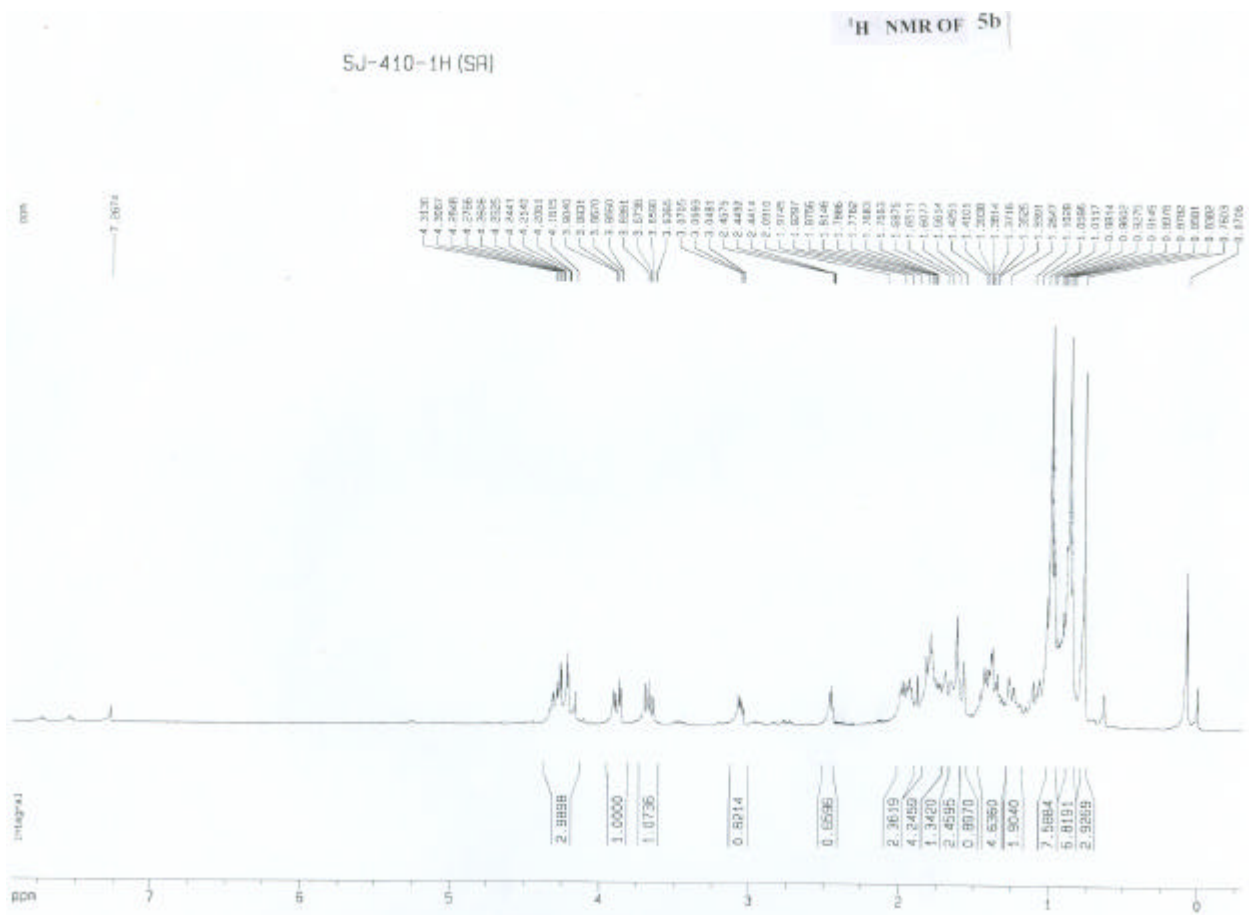

CG251-1H (SKD)

<sup>1</sup>H NMR of 6a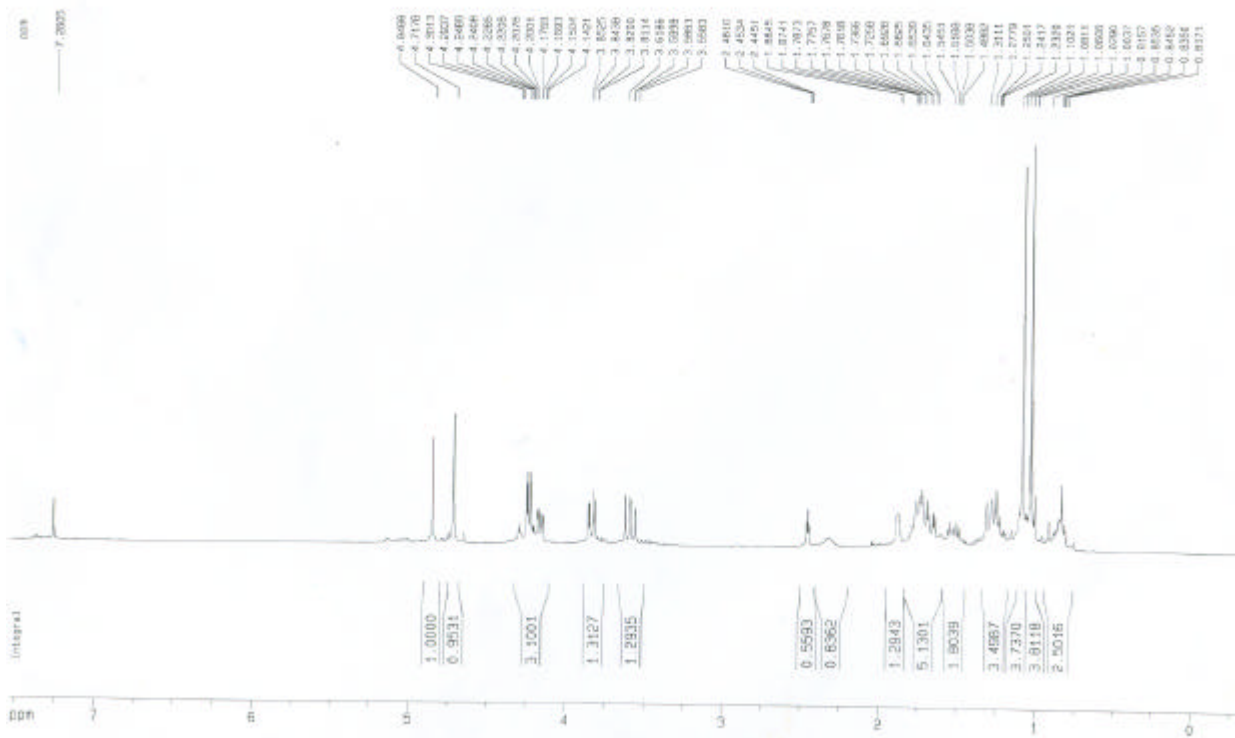

<sup>1</sup>H NMR of 6b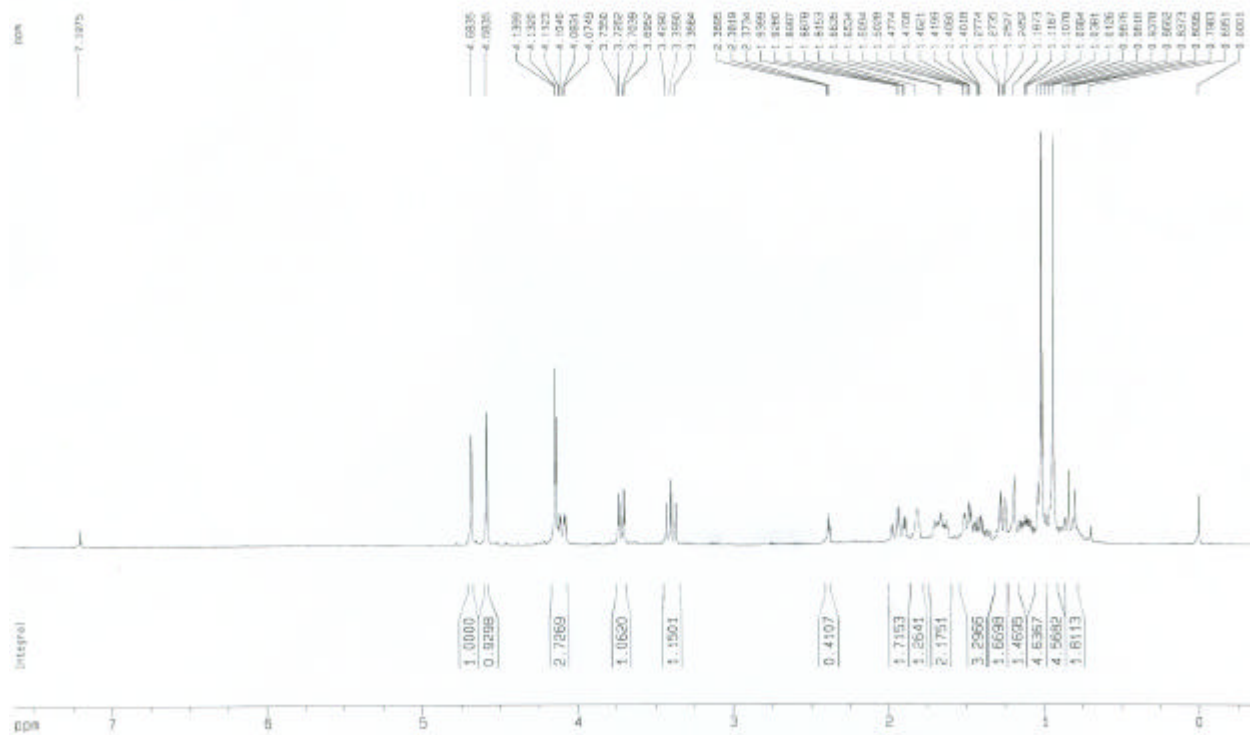

CG233-1H (SKD)

<sup>1</sup>H NMR of 10a

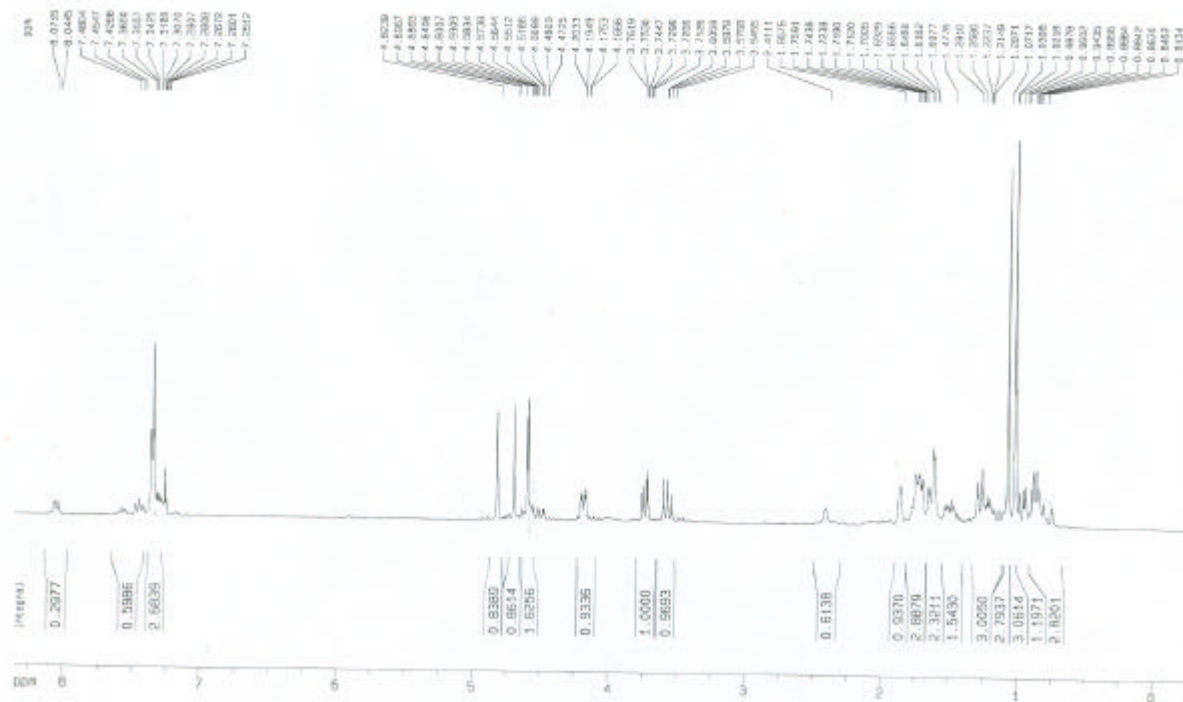

<sup>1</sup>H NMR of 12a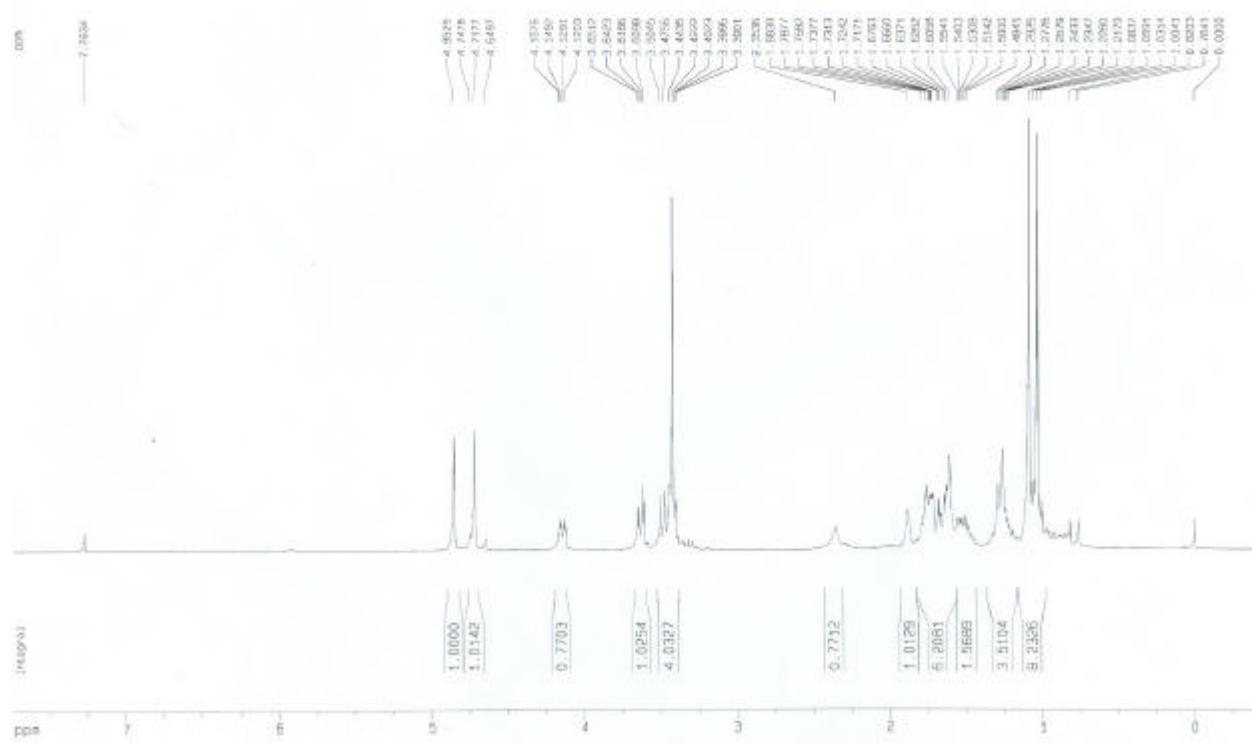



CG251-13C (SKD)

<sup>13</sup>C NMR of 6a

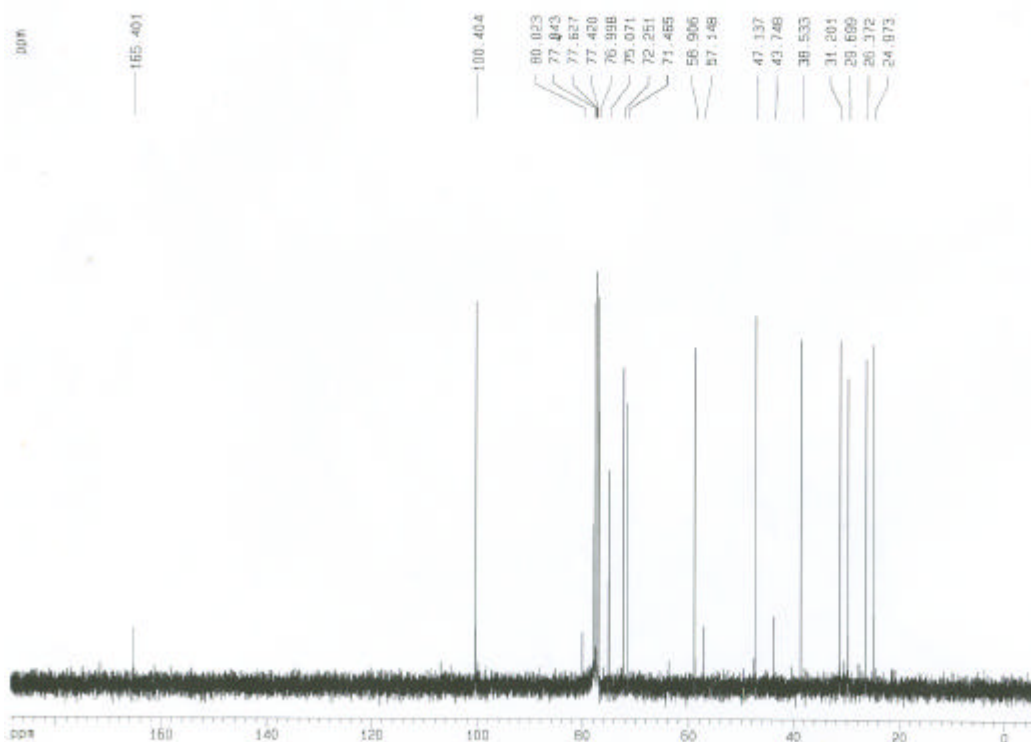

Current Data Parameters  
NAME CG251-13C  
EXPNO 1  
PROCNO 1

F2 - Acquisition Parameters  
Date\_ 000000  
Time 11.21  
INSTRUM spect  
PROBHD 5 mm Multinu  
PULPROG zgpg  
TD 105152  
SOLVENT CDCl3  
NS 2048  
DS 0  
SWH 22675.736 Hz  
FIDRES 0.267745 Hz  
AQ 2.4068515 sec  
RG 8192  
DM 32.050 usec  
DE 4.50 usec  
TE 300.0 K  
d11 0.030000 sec  
PL12 18.00 dB  
DPRPG2 waltz16  
PCPD2 100.00 usec  
SFO2 300.1314106 MHz  
NUC2 1H  
PL2 120.00 dB  
Q1 1.0000000 sec  
P1 10.00 usec  
CE 4.50 usec  
SFO1 75.4762608 MHz  
NUC1 13C  
PL1 -1.00 dB

F2 - Processing parameters  
SI 65536  
SF 75.4677150 MHz  
WDW EM  
SSB 0  
LB 0.30 Hz  
GB 0  
PC 1.00

80 NMR plot parameters  
CX 20.00 cm  
F1P 188.499 ppm  
F1 14225.61 Hz  
F2P -5.985 ppm  
F2 -451.68 Hz  
R/MCM 8.84020 ppm/cm  
HZCM 567.14954 Hz/cm

SJ-416-13C (SR)

<sup>13</sup>C NMR of 6b

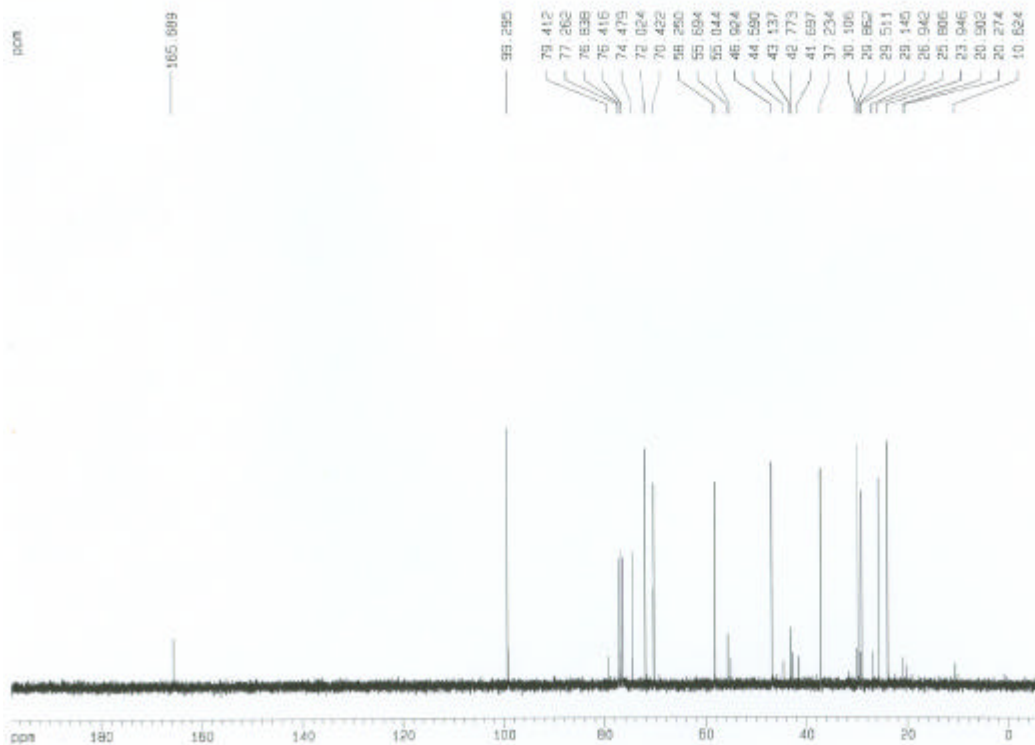

Current Data Parameters  
NAME SJ-416-13C  
EXPNO 1  
PROCNO 1

F2 - Acquisition Parameters  
Date\_ 50000  
Time 17.44  
INSTRUM dpx300  
PROBHD 5 mm Multinu  
PULPROG zgpg  
TD 65536  
SOLVENT COC13  
NS 1519  
DS 0  
SWH 21845.021 Hz  
FIDRES 0.250012 Hz  
AQ 1.9086557 sec  
RG 8192  
DW 23.100 usec  
DE 4.50 usec  
TE 300.0 K  
d11 0.030000 sec  
PL12 16.00 dB  
PCPD2 4811118  
PCPD2 100.00 usec  
SF02 300.1314106 MHz  
NUC2 1H  
PL2 120.00 dB  
D1 1.00000000 sec  
P1 6.70 usec  
DE 4.50 usec  
SF01 75.4772724 MHz  
NUC1 13C  
PL1 -8.00 dB

F2 - Processing parameters  
SI 65536  
SF 70.4677626 MHz  
WDW EM  
SSB 0  
LB 0.30 Hz  
GB 0  
PC 1.00

1D NMR plot parameters  
CX 22.00 cm  
F1P 197.714 pcw  
F1 14921.04 Hz  
F2P -6.655 pcw  
F2 -502.34 Hz  
PRCK 9.28267 pcw/cm  
HZCM 703.06293 Hz/cm

CG233-13C (SKD)

<sup>13</sup>C NMR of 10a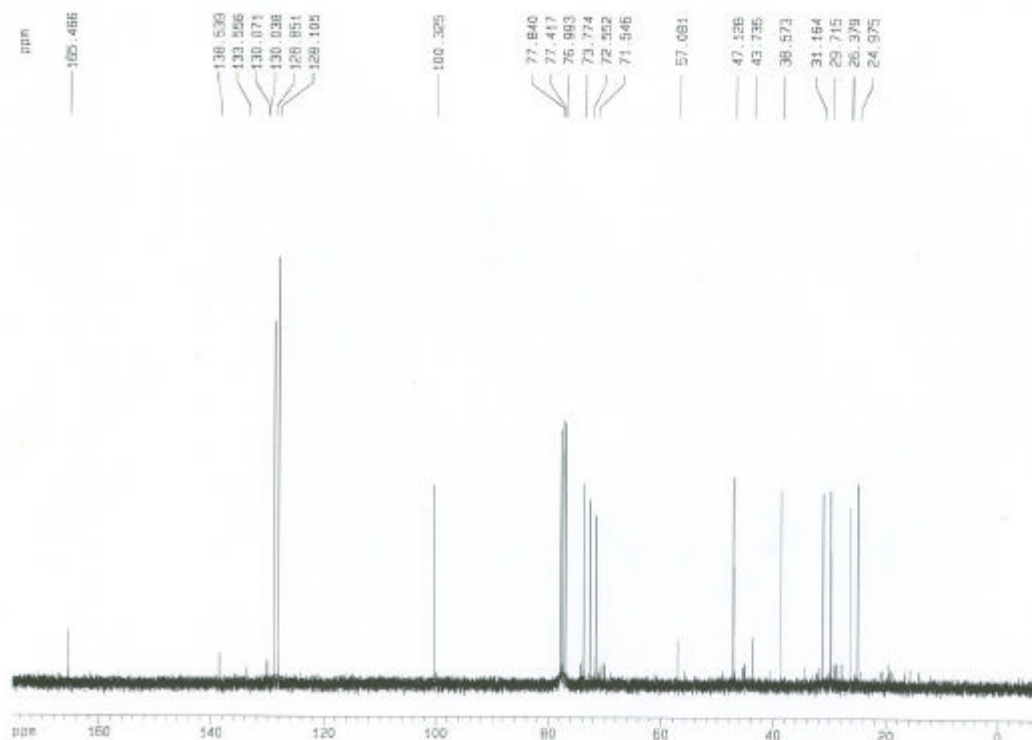

Current Data Parameters  
 NAME CG233-13C  
 EXPNO 1  
 PROCNO 1

F2 - Acquisition Parameters

Date\_ 000000  
 Time 13.31  
 INSTRUM dax300  
 PROBHD 5 mm Multinu  
 PULPROG zgpg  
 TD 109152  
 SOLVENT CDCl3  
 NS 2048  
 DS 0  
 SSB 02675.736 Hz  
 FIDRES 0.207740 Hz  
 AQ 2.4068515 sec  
 RG 8192  
 DW 22.250 usec  
 DE 4.50 usec  
 TE 300.0 K  
 d11 0.030000 sec  
 PL12 10.00 dB  
 CDPRG2 waltz16  
 PCPD2 100.00 usec  
 SFO2 300.1314106 MHz  
 NUC2 13C  
 PL2 120.00 dB  
 d1 1.0000000 sec  
 P1 10.50 usec  
 DE 4.50 usec  
 SFO1 75.4752808 MHz  
 NUC1 13C  
 PL1 -1.00 dB

F2 - Processing parameters

SI 62536  
 SF 75.4677190 MHz  
 WDW EM  
 SSB 0  
 LB 0.30 Hz  
 GB 0  
 PC 1.00

1D NMR plot parameters

CX 23.00 cm  
 F1F 175.298 ppm  
 F1 13229.17 Hz  
 F2F -7.056 ppm  
 F2 -532.47 Hz  
 PPMOH 8.28670 ppm/cg  
 HZCM 825.52917 Hz/cm

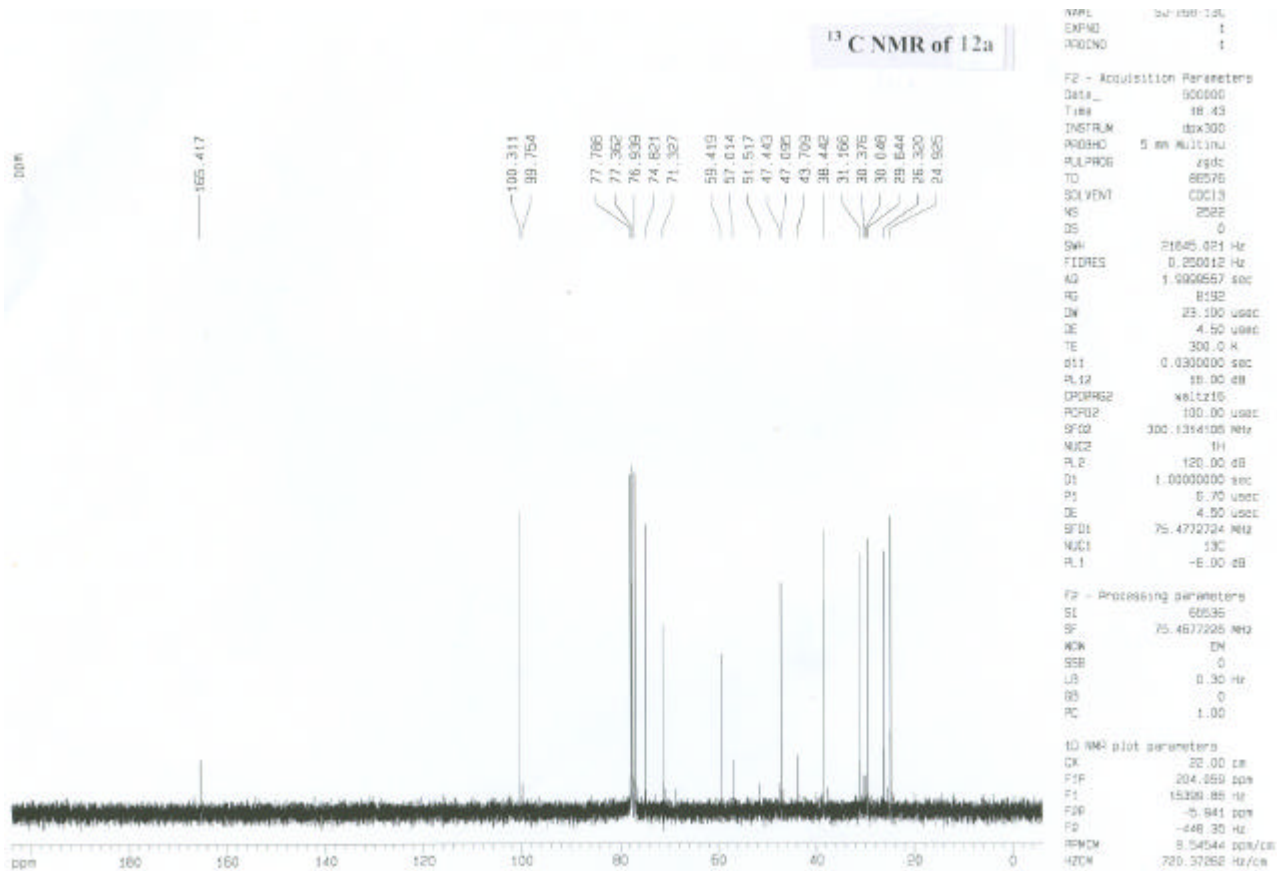

**X-Ray picture of 13**

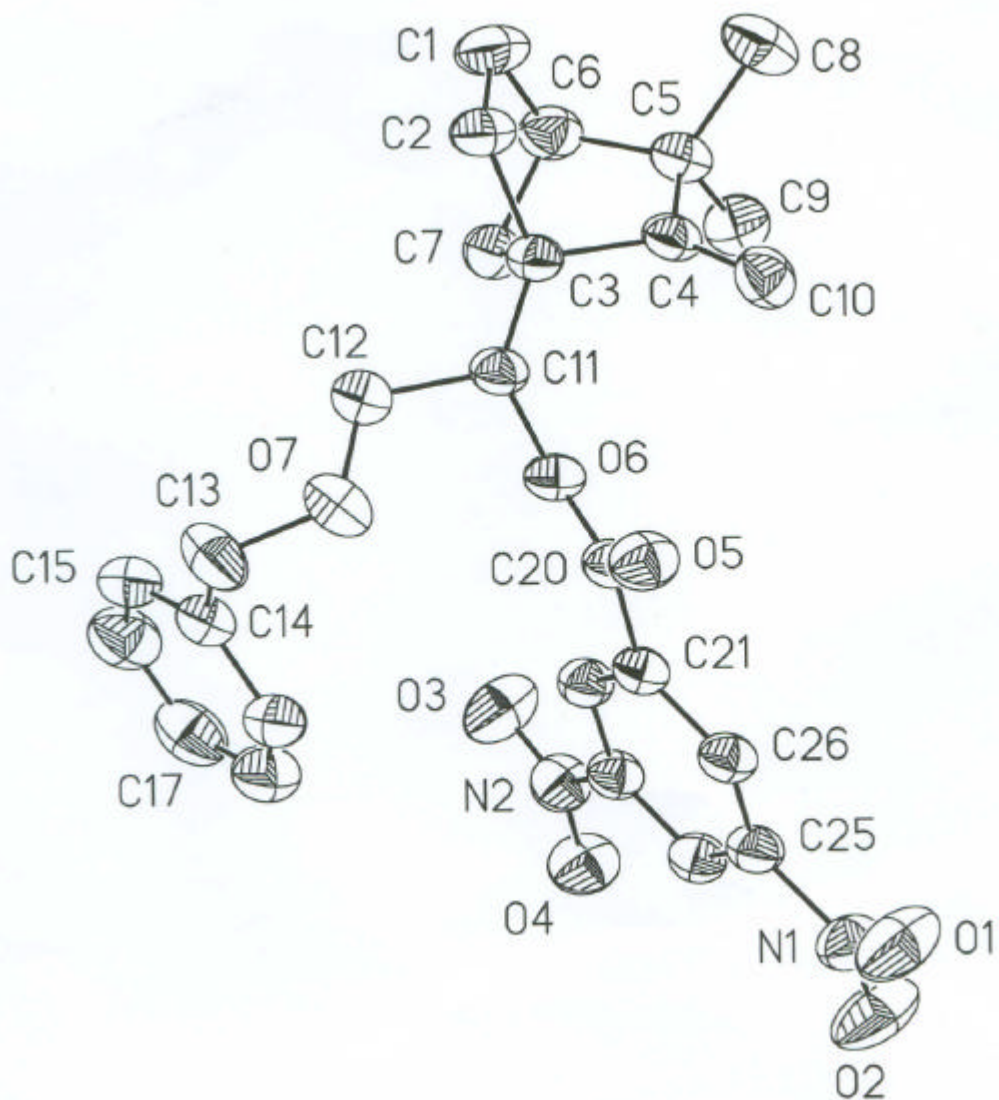

Supplement: Supplementary file 1 [file 5103427]
